# Supplementary material for: Analysis of influencing factors of anxiety and depression in maintenance hemodialysis patients and its correlation with BDNF, NT-3 and 5-HT levels
Source: PeerJ. 2023 Sep 21;11:e16068. doi: 10.7717/peerj.16068 (PMC10518163; doi:10.7717/peerj.16068)
Supplement: Data S1 [file peerj-11-16068-s001.xlsx]

## Sheet: Study group
BDNF	NT-3	5-HT	Anxiety or not	Depression or not	SAS score	SDS score	Sex	Age	Degree of education	Marital status	Household registration	Smoking	Drinking	Working status	Monthly dialysis times	Economic status	Fatigue	Insomnia	Vascular pain	Restless legs syndrome
60.77	3.89	66.32	Yes	Yes	57	54	F	45	Degree of education	Married	Rural	Yes	No	Unemployed	≤8 times	Worsening	Yes	Yes	Yes	No
90.86	1.61	46.89	No	Yes	38	57	M	68	Degree of education	Married	Rural	No	Yes	Unemployed	≤8 times	Worsening	No	Yes	No	No
65.7	1.65	43.35	No	Yes	32	75	M	51	Below high school	Single	Rural	Yes	Yes	Unemployed	＞8 times	General or good	No	No	Yes	No
59.76	1.38	36.13	No	No	33	29	M	51	Degree of education	Married	Urban	Yes	Yes	In-service	≤8 times	General or good	Yes	No	Yes	No
78.36	1.56	39.43	No	Yes	33	60	F	66	Degree of education	Single	Rural	No	Yes	Unemployed	≤8 times	Worsening	Yes	No	Yes	No
98.96	1.24	37.18	No	No	28	31	F	59	Below high school	Married	Urban	Yes	Yes	Unemployed	＞8 times	General or good	No	No	Yes	No
66.61	1.01	30.57	No	No	30	25	F	69	Below high school	Married	Urban	No	No	Unemployed	≤8 times	General or good	No	No	No	No
77.93	1.53	38.03	No	Yes	31	64	F	61	Degree of education	Married	Urban	Yes	No	Unemployed	≤8 times	General or good	No	No	Yes	No
87.37	1.56	37.37	No	Yes	29	57	M	50	Degree of education	Married	Rural	No	No	Unemployed	≤8 times	Worsening	No	No	Yes	No
73.9	1.45	42.76	No	Yes	28	68	F	65	Degree of education	Married	Urban	No	No	Unemployed	＞8 times	General or good	Yes	Yes	Yes	No
82.71	1.65	38.91	No	Yes	33	69	F	64	Degree of education	Single	Urban	Yes	No	In-service	＞8 times	Worsening	Yes	Yes	Yes	No
78.95	1.6	43.14	No	Yes	26	66	M	64	Degree of education	Married	Rural	Yes	No	Unemployed	＞8 times	Worsening	Yes	No	No	No
73.77	1.96	37.19	No	Yes	31	51	M	54	Below high school	Married	Urban	Yes	No	Unemployed	＞8 times	Worsening	Yes	Yes	Yes	No
74.34	1.66	44.07	No	Yes	30	53	F	57	Below high school	Married	Urban	No	No	Unemployed	＞8 times	General or good	Yes	No	Yes	No
47.16	1.67	37.72	No	Yes	34	56	F	55	Degree of education	Married	Urban	No	No	Unemployed	＞8 times	Worsening	Yes	No	Yes	No
88.83	1.49	37.85	No	Yes	41	81	M	49	Degree of education	Married	Urban	No	No	Unemployed	＞8 times	Worsening	Yes	Yes	Yes	No
88.14	1.59	46.01	No	Yes	39	60	F	56	Below high school	Married	Rural	No	No	Unemployed	＞8 times	Worsening	Yes	No	Yes	No
76.91	1.69	38.92	No	Yes	31	71	M	41	Degree of education	Married	Urban	No	No	Unemployed	≤8 times	Worsening	No	No	No	No
98.68	1.27	36.21	No	No	32	30	F	48	Degree of education	Married	Urban	Yes	No	Unemployed	＞8 times	General or good	No	No	Yes	No
76.25	1.47	42.66	No	Yes	40	67	F	68	Below high school	Single	Urban	No	No	In-service	＞8 times	Worsening	Yes	Yes	Yes	No
73.58	1.56	41.35	No	Yes	31	60	M	58	Degree of education	Married	Urban	Yes	No	Unemployed	＞8 times	Worsening	No	Yes	No	No
74.55	1.74	39.5	No	Yes	27	55	M	51	Degree of education	Single	Urban	No	No	Unemployed	≤8 times	General or good	No	Yes	No	No
89.33	1.54	42.73	No	Yes	29	52	F	69	Below high school	Married	Urban	No	No	Unemployed	＞8 times	Worsening	No	Yes	No	No
87.31	1.73	43.6	No	Yes	39	62	M	57	Below high school	Married	Urban	Yes	No	Unemployed	＞8 times	General or good	Yes	No	No	No
72.51	1.48	39.94	No	Yes	29	65	M	50	Degree of education	Married	Urban	No	No	In-service	＞8 times	General or good	Yes	Yes	No	No
91.61	1.92	37.63	No	Yes	32	61	M	44	Below high school	Married	Urban	No	No	Unemployed	＞8 times	Worsening	Yes	Yes	No	No
79.7	1.5	38.16	No	Yes	21	64	M	61	Degree of education	Married	Urban	Yes	No	Unemployed	≤8 times	Worsening	Yes	No	No	No
69.59	1.48	47.11	No	Yes	31	67	M	51	Below high school	Married	Urban	Yes	No	Unemployed	＞8 times	General or good	Yes	Yes	Yes	No
77.87	1.79	37.36	No	Yes	23	56	F	43	Degree of education	Married	Rural	Yes	No	Unemployed	＞8 times	Worsening	Yes	Yes	Yes	No
66.26	1.85	42.41	No	Yes	32	60	M	50	Below high school	Single	Urban	Yes	No	Unemployed	≤8 times	Worsening	Yes	Yes	No	No
86.65	1.67	39.66	No	Yes	31	56	M	52	Degree of education	Married	Urban	Yes	No	Unemployed	＞8 times	Worsening	No	No	Yes	No
81.35	1.78	43.38	No	Yes	27	75	F	51	Below high school	Single	Urban	No	No	In-service	＞8 times	Worsening	No	No	Yes	No
80.66	1.68	43.58	No	Yes	30	68	M	67	Degree of education	Married	Rural	No	No	Unemployed	＞8 times	General or good	Yes	Yes	Yes	No
79.66	1.64	47.36	No	Yes	37	54	M	58	Degree of education	Married	Urban	Yes	No	Unemployed	＞8 times	General or good	Yes	No	Yes	No
79.89	1.65	42.47	No	Yes	20	52	M	68	Below high school	Married	Urban	Yes	No	Unemployed	＞8 times	Worsening	Yes	No	Yes	No
83.82	1.61	44.54	No	Yes	31	61	M	60	Below high school	Married	Rural	Yes	No	Unemployed	＞8 times	Worsening	No	No	Yes	No
85.13	1.24	33.51	No	No	45	40	M	45	Below high school	Married	Urban	No	No	Unemployed	≤8 times	General or good	No	Yes	Yes	No
76.42	1.31	36.65	No	No	18	29	M	62	Degree of education	Married	Urban	Yes	No	Unemployed	≤8 times	General or good	Yes	No	No	No
78.12	1.4	34.97	No	No	34	28	F	62	Degree of education	Single	Urban	Yes	No	Unemployed	＞8 times	General or good	Yes	Yes	No	No
86.98	1.39	35.58	No	No	36	19	F	62	Degree of education	Married	Rural	Yes	No	Unemployed	＞8 times	General or good	No	No	No	No
96.56	1.17	35.41	No	No	25	21	M	62	Degree of education	Married	Urban	No	No	Unemployed	≤8 times	General or good	No	Yes	No	No
82.65	1.31	32.28	No	No	35	16	F	53	Degree of education	Married	Rural	No	No	Unemployed	＞8 times	General or good	No	No	Yes	No
92.38	1.29	35.61	No	No	28	26	M	55	Degree of education	Married	Urban	Yes	No	Unemployed	≤8 times	Worsening	No	No	No	No
86.81	1.39	29.78	No	No	28	37	M	48	Degree of education	Married	Rural	No	No	In-service	≤8 times	General or good	No	No	No	No
77.02	1.28	37.05	No	No	32	31	M	53	Below high school	Married	Urban	Yes	No	Unemployed	＞8 times	General or good	Yes	No	Yes	No
67.71	1.65	37.25	No	Yes	28	58	M	52	Degree of education	Single	Urban	Yes	No	Unemployed	≤8 times	Worsening	No	Yes	Yes	No
83.91	1.86	37.76	No	Yes	40	53	M	45	Degree of education	Single	Urban	Yes	No	Unemployed	≤8 times	Worsening	Yes	No	Yes	No
51.63	1.49	39.59	No	Yes	37	53	M	54	Degree of education	Single	Rural	No	No	Unemployed	＞8 times	General or good	Yes	No	No	No
61.01	1.49	39.74	No	Yes	35	69	M	47	Below high school	Married	Urban	No	No	Unemployed	＞8 times	General or good	Yes	Yes	Yes	No
75.83	1.17	36.96	No	No	38	27	M	56	Degree of education	Married	Urban	Yes	No	In-service	≤8 times	General or good	No	No	No	No
76.18	1.33	34.5	No	No	37	36	M	51	Degree of education	Married	Urban	Yes	No	Unemployed	＞8 times	General or good	No	Yes	Yes	No
74.09	1.41	36.73	No	No	27	31	M	65	Degree of education	Married	Urban	No	No	Unemployed	＞8 times	General or good	Yes	No	No	No
85.53	1.38	32.1	No	No	37	20	M	52	Below high school	Married	Urban	No	No	Unemployed	≤8 times	General or good	No	No	Yes	No
68.82	1.31	35.09	No	No	29	34	M	46	Below high school	Married	Urban	Yes	No	Unemployed	≤8 times	Worsening	No	Yes	No	No
69.83	1.42	31.2	No	No	34	32	F	61	Below high school	Married	Urban	Yes	No	Unemployed	＞8 times	Worsening	Yes	No	No	No
95.25	2.97	62.51	Yes	No	53	45	F	63	Degree of education	Married	Urban	Yes	No	Unemployed	＞8 times	General or good	No	No	No	Yes
91.14	5.36	78.36	Yes	Yes	60	52	M	45	Degree of education	Single	Rural	Yes	No	Unemployed	＞8 times	Worsening	Yes	Yes	Yes	Yes
77.82	3.23	65.16	Yes	Yes	60	61	M	63	Degree of education	Married	Rural	Yes	No	Unemployed	＞8 times	Worsening	Yes	Yes	No	Yes
74.55	4.53	78.04	Yes	Yes	52	71	M	56	Below high school	Married	Rural	Yes	No	Unemployed	＞8 times	General or good	No	Yes	No	Yes
70.37	3.85	79.22	Yes	Yes	66	71	M	56	Degree of education	Married	Urban	No	No	In-service	＞8 times	General or good	Yes	Yes	Yes	Yes
67.89	3.43	68.27	Yes	Yes	56	81	F	68	Below high school	Married	Rural	No	No	Unemployed	＞8 times	Worsening	No	Yes	Yes	Yes
71.91	4.58	63.36	Yes	Yes	68	56	F	55	Below high school	Married	Urban	No	No	Unemployed	＞8 times	General or good	No	Yes	Yes	Yes
77.65	3.52	68.22	Yes	Yes	51	61	F	66	Degree of education	Single	Rural	Yes	No	Unemployed	＞8 times	Worsening	Yes	Yes	No	Yes
88.1	3.55	68.14	Yes	Yes	54	59	M	61	Below high school	Married	Rural	Yes	No	Unemployed	＞8 times	Worsening	No	Yes	No	Yes
74.61	3.41	67.05	Yes	Yes	58	61	F	56	Degree of education	Married	Urban	No	No	Unemployed	＞8 times	General or good	Yes	Yes	Yes	Yes
85.04	3.66	66.19	Yes	Yes	64	78	F	56	Below high school	Married	Urban	Yes	No	Unemployed	＞8 times	Worsening	No	Yes	Yes	Yes
81.21	4.64	76.04	Yes	Yes	52	54	M	56	Degree of education	Married	Rural	Yes	No	Unemployed	＞8 times	Worsening	No	Yes	Yes	Yes
102.82	2.88	47.31	Yes	No	64	31	F	64	Below high school	Married	Urban	No	No	Unemployed	＞8 times	General or good	Yes	No	Yes	Yes
92.86	4.22	74.01	Yes	Yes	54	56	M	55	Below high school	Married	Urban	Yes	No	Unemployed	≤8 times	General or good	Yes	Yes	Yes	Yes
81.63	3.27	65.17	Yes	Yes	70	69	F	68	Degree of education	Married	Rural	Yes	No	Unemployed	＞8 times	Worsening	No	Yes	No	Yes
82.07	3.44	77.02	Yes	Yes	58	57	F	58	Below high school	Married	Rural	No	No	Unemployed	＞8 times	General or good	No	Yes	No	Yes
80.92	3.59	77.74	Yes	Yes	66	69	F	69	Below high school	Married	Rural	No	No	Unemployed	＞8 times	Worsening	Yes	Yes	Yes	Yes
71.35	3.42	70.1	Yes	Yes	56	69	F	63	Below high school	Married	Rural	No	No	In-service	＞8 times	General or good	No	Yes	No	Yes
68.53	3.47	64.73	Yes	Yes	54	57	F	47	Degree of education	Married	Urban	No	No	Unemployed	＞8 times	Worsening	Yes	Yes	Yes	Yes
64.6	5	67.31	Yes	Yes	75	53	F	48	Degree of education	Married	Urban	No	No	Unemployed	＞8 times	Worsening	Yes	Yes	No	Yes
76.23	3.33	66	Yes	Yes	57	64	M	47	Below high school	Married	Urban	No	No	Unemployed	＞8 times	General or good	Yes	Yes	Yes	Yes
67.8	3.94	73.18	Yes	Yes	55	53	M	51	Below high school	Married	Rural	No	No	In-service	＞8 times	Worsening	No	Yes	Yes	Yes
69.95	4.01	76.92	Yes	Yes	56	62	M	54	Degree of education	Married	Rural	No	No	Unemployed	＞8 times	Worsening	No	No	Yes	Yes
95.11	2.77	61.51	Yes	No	50	32	M	54	Below high school	Married	Urban	Yes	No	Unemployed	＞8 times	General or good	No	No	Yes	Yes
78.75	3.59	73.67	Yes	Yes	51	56	M	49	Degree of education	Single	Rural	No	No	Unemployed	＞8 times	Worsening	No	Yes	Yes	Yes
104.12	3.44	67.84	Yes	Yes	66	62	F	53	Degree of education	Married	Rural	Yes	No	Unemployed	＞8 times	General or good	Yes	No	No	Yes
97.31	2.27	61.66	Yes	No	76	28	M	43	Degree of education	Married	Urban	Yes	No	In-service	＞8 times	Worsening	No	No	Yes	Yes
79.39	2.81	61.98	Yes	No	51	32	F	51	Below high school	Married	Urban	Yes	No	Unemployed	＞8 times	General or good	Yes	No	Yes	Yes
70.83	3.01	52.89	Yes	No	64	27	F	59	Degree of education	Married	Urban	No	No	Unemployed	＞8 times	General or good	Yes	No	No	Yes
77.78	3.01	62.03	Yes	No	50	34	F	45	Degree of education	Married	Urban	Yes	No	Unemployed	＞8 times	General or good	Yes	Yes	No	Yes
66.37	4.34	62.81	Yes	Yes	66	68	M	55	Below high school	Married	Rural	No	No	Unemployed	＞8 times	Worsening	Yes	No	No	Yes
85.56	2.94	60.33	Yes	No	53	22	F	53	Degree of education	Married	Urban	No	No	Unemployed	＞8 times	Worsening	No	Yes	No	Yes
101.2	2.88	57.72	Yes	No	57	37	M	61	Below high school	Married	Urban	No	No	In-service	＞8 times	Worsening	No	No	No	Yes
73.26	3.14	57.53	Yes	No	53	24	F	53	Below high school	Married	Urban	No	No	Unemployed	＞8 times	General or good	No	Yes	No	Yes
87.14	2.68	58.44	Yes	No	58	33	M	54	Below high school	Married	Urban	Yes	No	Unemployed	≤8 times	Worsening	No	No	Yes	Yes
101.42	2.51	61.11	Yes	No	57	33	M	52	Below high school	Married	Urban	Yes	Yes	Unemployed	＞8 times	General or good	No	No	Yes	Yes
52.45	4.04	66.15	Yes	Yes	58	58	F	46	Below high school	Married	Urban	No	No	Unemployed	＞8 times	General or good	No	Yes	No	Yes
67.99	2.78	59.49	Yes	No	58	17	M	58	Degree of education	Married	Urban	No	No	Unemployed	＞8 times	Worsening	No	No	Yes	Yes
55.35	3.4	62.8	Yes	Yes	76	56	F	61	Degree of education	Married	Rural	No	No	Unemployed	＞8 times	Worsening	No	No	Yes	Yes
70.79	2.96	60.33	Yes	No	69	33	F	52	Degree of education	Married	Urban	No	No	Unemployed	≤8 times	Worsening	Yes	No	No	Yes
72.45	1.48	41.86	No	Yes	37	62	M	64	Below high school	Single	Urban	Yes	Yes	Unemployed	＞8 times	Worsening	No	No	Yes	Yes
77.52	2.12	44.66	No	Yes	33	75	F	62	Below high school	Married	Urban	Yes	No	Unemployed	＞8 times	General or good	No	No	Yes	Yes
83.87	1.65	40.07	No	Yes	26	53	F	61	Degree of education	Married	Urban	No	No	Unemployed	＞8 times	Worsening	Yes	No	No	Yes
75.91	1.62	42.31	No	Yes	32	58	M	66	Degree of education	Married	Urban	Yes	No	Unemployed	≤8 times	Worsening	Yes	No	No	Yes
78.15	1.52	40.57	No	Yes	27	52	M	65	Degree of education	Married	Rural	No	No	Unemployed	＞8 times	General or good	Yes	Yes	No	Yes
90.03	1.93	42.11	No	Yes	33	69	M	59	Degree of education	Single	Urban	No	No	Unemployed	≤8 times	Worsening	No	Yes	Yes	Yes
78.9	1.43	41.11	No	Yes	35	73	M	59	Below high school	Married	Urban	Yes	No	Unemployed	≤8 times	Worsening	Yes	Yes	Yes	Yes
78.77	1.45	39.92	No	Yes	41	54	M	56	Below high school	Married	Urban	Yes	No	Unemployed	＞8 times	General or good	No	No	Yes	Yes
66.66	1.67	42.56	No	Yes	24	66	M	52	Below high school	Single	Urban	No	No	Unemployed	＞8 times	Worsening	No	Yes	No	Yes
85.75	1.61	46.03	No	Yes	41	56	M	69	Below high school	Married	Urban	Yes	No	Unemployed	≤8 times	Worsening	No	Yes	Yes	Yes
83.65	1.96	38.66	No	Yes	34	81	M	59	Below high school	Married	Urban	Yes	No	Unemployed	≤8 times	Worsening	No	Yes	Yes	Yes
87.92	1.74	44.3	No	Yes	42	67	M	54	Below high school	Married	Urban	Yes	No	In-service	≤8 times	Worsening	Yes	No	Yes	Yes
77.49	1.52	37.79	No	Yes	33	59	F	66	Degree of education	Married	Urban	Yes	No	Unemployed	≤8 times	Worsening	No	Yes	Yes	Yes
98.54	0.92	35.4	No	No	20	35	F	59	Below high school	Married	Urban	No	No	Unemployed	＞8 times	Worsening	Yes	No	No	Yes
98.72	0.86	36.51	No	No	22	23	F	59	Degree of education	Married	Urban	No	No	Unemployed	≤8 times	General or good	No	No	Yes	Yes
64.71	1.67	44.94	No	Yes	25	73	M	61	Degree of education	Married	Urban	Yes	No	Unemployed	＞8 times	General or good	No	No	Yes	Yes
67.67	1.48	43.26	No	Yes	31	54	M	62	Degree of education	Married	Urban	No	No	Unemployed	≤8 times	General or good	Yes	No	Yes	Yes
93.72	1.29	35.87	No	No	34	29	M	51	Below high school	Married	Urban	Yes	No	Unemployed	＞8 times	Worsening	Yes	No	No	Yes
74.09	1.38	36.26	No	No	38	30	M	56	Below high school	Married	Urban	No	No	Unemployed	＞8 times	General or good	No	No	No	Yes
99.19	1.37	31.78	No	No	24	37	M	62	Below high school	Married	Urban	Yes	No	In-service	＞8 times	Worsening	No	No	Yes	Yes
80.06	1.36	35.2	No	No	37	30	M	53	Below high school	Married	Urban	Yes	No	Unemployed	＞8 times	General or good	No	Yes	Yes	Yes
77.86	1.29	35.63	No	No	40	22	M	62	Degree of education	Married	Rural	No	No	Unemployed	≤8 times	General or good	No	No	Yes	Yes
84.27	1.4	33.43	No	No	32	29	M	57	Degree of education	Married	Urban	Yes	No	Unemployed	＞8 times	General or good	No	No	No	Yes
79.44	1.4	29.92	No	No	33	26	M	57	Below high school	Married	Urban	No	No	Unemployed	≤8 times	General or good	No	No	No	Yes
73.56	1.08	36.34	No	No	34	34	M	52	Below high school	Married	Urban	Yes	No	Unemployed	≤8 times	General or good	No	No	No	Yes

## Sheet: Control group
BDNF	NT-3	5-HT
60.95	0.25	32.25
88.97	0.21	32.69
90.35	0.32	30.27
98.76	0.18	31.15
99.33	0.11	33.23
82.51	0.27	32.62
74.48	0.36	32.37
74.68	0.12	38.56
81.72	0.25	29.22
69.72	0.13	40.5
113.3	0.12	31.75
70.91	0.25	31.76
92.56	0.22	38.93
84.46	0.27	45.49
88.84	0.12	46.89
73.54	0.26	33.92
81.9	0.24	36
76.62	0.25	40.77
66.57	0.37	43.16
80.1	0.21	29.06
88.44	0.18	34.78
76.04	0.39	40.07
95.04	0.31	36.52
86.65	0.22	32.73
76.07	0.31	42.54
71.35	0.23	46.38
86.36	0.2	38.49
104.46	0.18	34.38
79.26	0.33	36.67
74.75	0.21	43.74
83.19	0.24	38.04
85.25	0.25	33.61
57.68	0.3	39.01
79.68	0.19	40.55
87.7	0.22	35.02
88.51	0.41	36.84
88.55	0.14	48.26
72.31	0.25	51.57
68.24	0.03	48.63
92.1	0.15	47.69
107.73	0.26	42.52
72.6	0.23	39.11
91.05	0.33	37.4
65.97	0.22	37.3
84.54	0.27	32.39
86.2	0.15	28.34
74.94	0.26	26.01
89.45	0.32	32.59
85	0.3	44.8
81.38	0.37	39.08
78.27	0.15	36.68
94.86	0.16	31.72
67.93	0.32	42.75
78.08	0.14	41.95
81.22	0.37	43.57
90.83	0.17	49.46
85.41	0.13	38.07
91.34	0.3	45.81
85.75	0.37	34.32
77.08	0.21	31.69

## Sheet: Anxiety group
BDNF	NT-3	5-HT	SAS score	SDS score	Sex	Age	Degree of education	Marital status	Household registration	Smoking	Drinking	Working status	Monthly dialysis times	Economic status	Fatigue	Insomnia	Vascular pain	Restless legs syndrome
60.77	3.89	66.32	57	54	F	45	High school and above	Married	Rural	Yes	No	Unemployed	≤8 times	Worsening	Yes	Yes	Yes	No
95.25	2.97	62.51	53	45	F	63	High school and above	Married	Urban	Yes	No	Unemployed	＞8 times	General or good	No	No	No	Yes
91.14	5.36	78.36	60	52	M	45	High school and above	Single	Rural	Yes	No	Unemployed	＞8 times	Worsening	Yes	Yes	Yes	Yes
77.82	3.23	65.16	60	61	M	63	High school and above	Married	Rural	Yes	No	Unemployed	＞8 times	Worsening	Yes	Yes	No	Yes
74.55	4.53	78.04	52	71	M	56	Below high school	Married	Rural	Yes	No	Unemployed	＞8 times	General or good	No	Yes	No	Yes
70.37	3.85	79.22	66	71	M	56	High school and above	Married	Urban	No	No	In-service	＞8 times	General or good	Yes	Yes	Yes	Yes
67.89	3.43	68.27	56	81	F	68	Below high school	Married	Rural	No	No	Unemployed	＞8 times	Worsening	No	Yes	Yes	Yes
71.91	4.58	63.36	68	56	F	55	Below high school	Married	Urban	No	No	Unemployed	＞8 times	General or good	No	Yes	Yes	Yes
77.65	3.52	68.22	51	61	F	66	High school and above	Single	Rural	Yes	No	Unemployed	＞8 times	Worsening	Yes	Yes	No	Yes
88.1	3.55	68.14	54	59	M	61	Below high school	Married	Rural	Yes	No	Unemployed	＞8 times	Worsening	No	Yes	No	Yes
74.61	3.41	67.05	58	61	F	56	High school and above	Married	Urban	No	No	Unemployed	＞8 times	General or good	Yes	Yes	Yes	Yes
85.04	3.66	66.19	64	78	F	56	Below high school	Married	Urban	Yes	No	Unemployed	＞8 times	Worsening	No	Yes	Yes	Yes
81.21	4.64	76.04	52	54	M	56	High school and above	Married	Rural	Yes	No	Unemployed	＞8 times	Worsening	No	Yes	Yes	Yes
102.82	2.88	47.31	64	31	F	64	Below high school	Married	Urban	No	No	Unemployed	＞8 times	General or good	Yes	No	Yes	Yes
92.86	4.22	74.01	54	56	M	55	Below high school	Married	Urban	Yes	No	Unemployed	≤8 times	General or good	Yes	Yes	Yes	Yes
81.63	3.27	65.17	70	69	F	68	High school and above	Married	Rural	Yes	No	Unemployed	＞8 times	Worsening	No	Yes	No	Yes
82.07	3.44	77.02	58	57	F	58	Below high school	Married	Rural	No	No	Unemployed	＞8 times	General or good	No	Yes	No	Yes
80.92	3.59	77.74	66	69	F	69	Below high school	Married	Rural	No	No	Unemployed	＞8 times	Worsening	Yes	Yes	Yes	Yes
71.35	3.42	70.1	56	69	F	63	Below high school	Married	Rural	No	No	In-service	＞8 times	General or good	No	Yes	No	Yes
68.53	3.47	64.73	54	57	F	47	High school and above	Married	Urban	No	No	Unemployed	＞8 times	Worsening	Yes	Yes	Yes	Yes
64.6	5	67.31	75	53	F	48	High school and above	Married	Urban	No	No	Unemployed	＞8 times	Worsening	Yes	Yes	No	Yes
76.23	3.33	66	57	64	M	47	Below high school	Married	Urban	No	No	Unemployed	＞8 times	General or good	Yes	Yes	Yes	Yes
67.8	3.94	73.18	55	53	M	51	Below high school	Married	Rural	No	No	In-service	＞8 times	Worsening	No	Yes	Yes	Yes
69.95	4.01	76.92	56	62	M	54	High school and above	Married	Rural	No	No	Unemployed	＞8 times	Worsening	No	No	Yes	Yes
95.11	2.77	61.51	50	32	M	54	Below high school	Married	Urban	Yes	No	Unemployed	＞8 times	General or good	No	No	Yes	Yes
78.75	3.59	73.67	51	56	M	49	High school and above	Single	Rural	No	No	Unemployed	＞8 times	Worsening	No	Yes	Yes	Yes
104.12	3.44	67.84	66	62	F	53	High school and above	Married	Rural	Yes	No	Unemployed	＞8 times	General or good	Yes	No	No	Yes
97.31	2.27	61.66	76	28	M	43	High school and above	Married	Urban	Yes	No	In-service	＞8 times	Worsening	No	No	Yes	Yes
79.39	2.81	61.98	51	32	F	51	Below high school	Married	Urban	Yes	No	Unemployed	＞8 times	General or good	Yes	No	Yes	Yes
70.83	3.01	52.89	64	27	F	59	High school and above	Married	Urban	No	No	Unemployed	＞8 times	General or good	Yes	No	No	Yes
77.78	3.01	62.03	50	34	F	45	High school and above	Married	Urban	Yes	No	Unemployed	＞8 times	General or good	Yes	Yes	No	Yes
66.37	4.34	62.81	66	68	M	55	Below high school	Married	Rural	No	No	Unemployed	＞8 times	Worsening	Yes	No	No	Yes
85.56	2.94	60.33	53	22	F	53	High school and above	Married	Urban	No	No	Unemployed	＞8 times	Worsening	No	Yes	No	Yes
101.2	2.88	57.72	57	37	M	61	Below high school	Married	Urban	No	No	In-service	＞8 times	Worsening	No	No	No	Yes
73.26	3.14	57.53	53	24	F	53	Below high school	Married	Urban	No	No	Unemployed	＞8 times	General or good	No	Yes	No	Yes
87.14	2.68	58.44	58	33	M	54	Below high school	Married	Urban	Yes	No	Unemployed	≤8 times	Worsening	No	No	Yes	Yes
101.42	2.51	61.11	57	33	M	52	Below high school	Married	Urban	Yes	Yes	Unemployed	＞8 times	General or good	No	No	Yes	Yes
52.45	4.04	66.15	58	58	F	46	Below high school	Married	Urban	No	No	Unemployed	＞8 times	General or good	No	Yes	No	Yes
67.99	2.78	59.49	58	17	M	58	High school and above	Married	Urban	No	No	Unemployed	＞8 times	Worsening	No	No	Yes	Yes
55.35	3.4	62.8	76	56	F	61	High school and above	Married	Rural	No	No	Unemployed	＞8 times	Worsening	No	No	Yes	Yes
70.79	2.96	60.33	69	33	F	52	High school and above	Married	Urban	No	No	Unemployed	≤8 times	Worsening	Yes	No	No	Yes

## Sheet: Non-anxiety group
BDNF	NT-3	5-HT	SAS score	SDS score	Sex	Age	Degree of education	Marital status	Household registration	Smoking	Drinking	Working status	Monthly dialysis times	Economic status	Fatigue	Insomnia	Vascular pain	Restless legs syndrome
90.86	1.61	46.89	38	57	M	68	Degree of education	Married	Rural	No	Yes	Unemployed	≤8 times	Worsening	No	Yes	No	No
65.7	1.65	43.35	32	75	M	51	Below high school	Single	Rural	Yes	Yes	Unemployed	＞8 times	General or good	No	No	Yes	No
59.76	1.38	36.13	33	29	M	51	Degree of education	Married	Urban	Yes	Yes	In-service	≤8 times	General or good	Yes	No	Yes	No
78.36	1.56	39.43	33	60	F	66	Degree of education	Single	Rural	No	Yes	Unemployed	≤8 times	Worsening	Yes	No	Yes	No
98.96	1.24	37.18	28	31	F	59	Below high school	Married	Urban	Yes	Yes	Unemployed	＞8 times	General or good	No	No	Yes	No
66.61	1.01	30.57	30	25	F	69	Below high school	Married	Urban	No	No	Unemployed	≤8 times	General or good	No	No	No	No
77.93	1.53	38.03	31	64	F	61	Degree of education	Married	Urban	Yes	No	Unemployed	≤8 times	General or good	No	No	Yes	No
87.37	1.56	37.37	29	57	M	50	Degree of education	Married	Rural	No	No	Unemployed	≤8 times	Worsening	No	No	Yes	No
73.9	1.45	42.76	28	68	F	65	Degree of education	Married	Urban	No	No	Unemployed	＞8 times	General or good	Yes	Yes	Yes	No
82.71	1.65	38.91	33	69	F	64	Degree of education	Single	Urban	Yes	No	In-service	＞8 times	Worsening	Yes	Yes	Yes	No
78.95	1.6	43.14	26	66	M	64	Degree of education	Married	Rural	Yes	No	Unemployed	＞8 times	Worsening	Yes	No	No	No
73.77	1.96	37.19	31	51	M	54	Below high school	Married	Urban	Yes	No	Unemployed	＞8 times	Worsening	Yes	Yes	Yes	No
74.34	1.66	44.07	30	53	F	57	Below high school	Married	Urban	No	No	Unemployed	＞8 times	General or good	Yes	No	Yes	No
47.16	1.67	37.72	34	56	F	55	Degree of education	Married	Urban	No	No	Unemployed	＞8 times	Worsening	Yes	No	Yes	No
88.83	1.49	37.85	41	81	M	49	Degree of education	Married	Urban	No	No	Unemployed	＞8 times	Worsening	Yes	Yes	Yes	No
88.14	1.59	46.01	39	60	F	56	Below high school	Married	Rural	No	No	Unemployed	＞8 times	Worsening	Yes	No	Yes	No
76.91	1.69	38.92	31	71	M	41	Degree of education	Married	Urban	No	No	Unemployed	≤8 times	Worsening	No	No	No	No
98.68	1.27	36.21	32	30	F	48	Degree of education	Married	Urban	Yes	No	Unemployed	＞8 times	General or good	No	No	Yes	No
76.25	1.47	42.66	40	67	F	68	Below high school	Single	Urban	No	No	In-service	＞8 times	Worsening	Yes	Yes	Yes	No
73.58	1.56	41.35	31	60	M	58	Degree of education	Married	Urban	Yes	No	Unemployed	＞8 times	Worsening	No	Yes	No	No
74.55	1.74	39.5	27	55	M	51	Degree of education	Single	Urban	No	No	Unemployed	≤8 times	General or good	No	Yes	No	No
89.33	1.54	42.73	29	52	F	69	Below high school	Married	Urban	No	No	Unemployed	＞8 times	Worsening	No	Yes	No	No
87.31	1.73	43.6	39	62	M	57	Below high school	Married	Urban	Yes	No	Unemployed	＞8 times	General or good	Yes	No	No	No
72.51	1.48	39.94	29	65	M	50	Degree of education	Married	Urban	No	No	In-service	＞8 times	General or good	Yes	Yes	No	No
91.61	1.92	37.63	32	61	M	44	Below high school	Married	Urban	No	No	Unemployed	＞8 times	Worsening	Yes	Yes	No	No
79.7	1.5	38.16	21	64	M	61	Degree of education	Married	Urban	Yes	No	Unemployed	≤8 times	Worsening	Yes	No	No	No
69.59	1.48	47.11	31	67	M	51	Below high school	Married	Urban	Yes	No	Unemployed	＞8 times	General or good	Yes	Yes	Yes	No
77.87	1.79	37.36	23	56	F	43	Degree of education	Married	Rural	Yes	No	Unemployed	＞8 times	Worsening	Yes	Yes	Yes	No
66.26	1.85	42.41	32	60	M	50	Below high school	Single	Urban	Yes	No	Unemployed	≤8 times	Worsening	Yes	Yes	No	No
86.65	1.67	39.66	31	56	M	52	Degree of education	Married	Urban	Yes	No	Unemployed	＞8 times	Worsening	No	No	Yes	No
81.35	1.78	43.38	27	75	F	51	Below high school	Single	Urban	No	No	In-service	＞8 times	Worsening	No	No	Yes	No
80.66	1.68	43.58	30	68	M	67	Degree of education	Married	Rural	No	No	Unemployed	＞8 times	General or good	Yes	Yes	Yes	No
79.66	1.64	47.36	37	54	M	58	Degree of education	Married	Urban	Yes	No	Unemployed	＞8 times	General or good	Yes	No	Yes	No
79.89	1.65	42.47	20	52	M	68	Below high school	Married	Urban	Yes	No	Unemployed	＞8 times	Worsening	Yes	No	Yes	No
83.82	1.61	44.54	31	61	M	60	Below high school	Married	Rural	Yes	No	Unemployed	＞8 times	Worsening	No	No	Yes	No
85.13	1.24	33.51	45	40	M	45	Below high school	Married	Urban	No	No	Unemployed	≤8 times	General or good	No	Yes	Yes	No
76.42	1.31	36.65	18	29	M	62	Degree of education	Married	Urban	Yes	No	Unemployed	≤8 times	General or good	Yes	No	No	No
78.12	1.4	34.97	34	28	F	62	Degree of education	Single	Urban	Yes	No	Unemployed	＞8 times	General or good	Yes	Yes	No	No
86.98	1.39	35.58	36	19	F	62	Degree of education	Married	Rural	Yes	No	Unemployed	＞8 times	General or good	No	No	No	No
96.56	1.17	35.41	25	21	M	62	Degree of education	Married	Urban	No	No	Unemployed	≤8 times	General or good	No	Yes	No	No
82.65	1.31	32.28	35	16	F	53	Degree of education	Married	Rural	No	No	Unemployed	＞8 times	General or good	No	No	Yes	No
92.38	1.29	35.61	28	26	M	55	Degree of education	Married	Urban	Yes	No	Unemployed	≤8 times	Worsening	No	No	No	No
86.81	1.39	29.78	28	37	M	48	Degree of education	Married	Rural	No	No	In-service	≤8 times	General or good	No	No	No	No
77.02	1.28	37.05	32	31	M	53	Below high school	Married	Urban	Yes	No	Unemployed	＞8 times	General or good	Yes	No	Yes	No
67.71	1.65	37.25	28	58	M	52	Degree of education	Single	Urban	Yes	No	Unemployed	≤8 times	Worsening	No	Yes	Yes	No
83.91	1.86	37.76	40	53	M	45	Degree of education	Single	Urban	Yes	No	Unemployed	≤8 times	Worsening	Yes	No	Yes	No
51.63	1.49	39.59	37	53	M	54	Degree of education	Single	Rural	No	No	Unemployed	＞8 times	General or good	Yes	No	No	No
61.01	1.49	39.74	35	69	M	47	Below high school	Married	Urban	No	No	Unemployed	＞8 times	General or good	Yes	Yes	Yes	No
75.83	1.17	36.96	38	27	M	56	Degree of education	Married	Urban	Yes	No	In-service	≤8 times	General or good	No	No	No	No
76.18	1.33	34.5	37	36	M	51	Degree of education	Married	Urban	Yes	No	Unemployed	＞8 times	General or good	No	Yes	Yes	No
74.09	1.41	36.73	27	31	M	65	Degree of education	Married	Urban	No	No	Unemployed	＞8 times	General or good	Yes	No	No	No
85.53	1.38	32.1	37	20	M	52	Below high school	Married	Urban	No	No	Unemployed	≤8 times	General or good	No	No	Yes	No
68.82	1.31	35.09	29	34	M	46	Below high school	Married	Urban	Yes	No	Unemployed	≤8 times	Worsening	No	Yes	No	No
69.83	1.42	31.2	34	32	F	61	Below high school	Married	Urban	Yes	No	Unemployed	＞8 times	Worsening	Yes	No	No	No
72.45	1.48	41.86	37	62	M	64	Below high school	Single	Urban	Yes	Yes	Unemployed	＞8 times	Worsening	No	No	Yes	Yes
77.52	2.12	44.66	33	75	F	62	Below high school	Married	Urban	Yes	No	Unemployed	＞8 times	General or good	No	No	Yes	Yes
83.87	1.65	40.07	26	53	F	61	Degree of education	Married	Urban	No	No	Unemployed	＞8 times	Worsening	Yes	No	No	Yes
75.91	1.62	42.31	32	58	M	66	Degree of education	Married	Urban	Yes	No	Unemployed	≤8 times	Worsening	Yes	No	No	Yes
78.15	1.52	40.57	27	52	M	65	Degree of education	Married	Rural	No	No	Unemployed	＞8 times	General or good	Yes	Yes	No	Yes
90.03	1.93	42.11	33	69	M	59	Degree of education	Single	Urban	No	No	Unemployed	≤8 times	Worsening	No	Yes	Yes	Yes
78.9	1.43	41.11	35	73	M	59	Below high school	Married	Urban	Yes	No	Unemployed	≤8 times	Worsening	Yes	Yes	Yes	Yes
78.77	1.45	39.92	41	54	M	56	Below high school	Married	Urban	Yes	No	Unemployed	＞8 times	General or good	No	No	Yes	Yes
66.66	1.67	42.56	24	66	M	52	Below high school	Single	Urban	No	No	Unemployed	＞8 times	Worsening	No	Yes	No	Yes
85.75	1.61	46.03	41	56	M	69	Below high school	Married	Urban	Yes	No	Unemployed	≤8 times	Worsening	No	Yes	Yes	Yes
83.65	1.96	38.66	34	81	M	59	Below high school	Married	Urban	Yes	No	Unemployed	≤8 times	Worsening	No	Yes	Yes	Yes
87.92	1.74	44.3	42	67	M	54	Below high school	Married	Urban	Yes	No	In-service	≤8 times	Worsening	Yes	No	Yes	Yes
77.49	1.52	37.79	33	59	F	66	Degree of education	Married	Urban	Yes	No	Unemployed	≤8 times	Worsening	No	Yes	Yes	Yes
98.54	0.92	35.4	20	35	F	59	Below high school	Married	Urban	No	No	Unemployed	＞8 times	Worsening	Yes	No	No	Yes
98.72	0.86	36.51	22	23	F	59	Degree of education	Married	Urban	No	No	Unemployed	≤8 times	General or good	No	No	Yes	Yes
64.71	1.67	44.94	25	73	M	61	Degree of education	Married	Urban	Yes	No	Unemployed	＞8 times	General or good	No	No	Yes	Yes
67.67	1.48	43.26	31	54	M	62	Degree of education	Married	Urban	No	No	Unemployed	≤8 times	General or good	Yes	No	Yes	Yes
93.72	1.29	35.87	34	29	M	51	Below high school	Married	Urban	Yes	No	Unemployed	＞8 times	Worsening	Yes	No	No	Yes
74.09	1.38	36.26	38	30	M	56	Below high school	Married	Urban	No	No	Unemployed	＞8 times	General or good	No	No	No	Yes
99.19	1.37	31.78	24	37	M	62	Below high school	Married	Urban	Yes	No	In-service	＞8 times	Worsening	No	No	Yes	Yes
80.06	1.36	35.2	37	30	M	53	Below high school	Married	Urban	Yes	No	Unemployed	＞8 times	General or good	No	Yes	Yes	Yes
77.86	1.29	35.63	40	22	M	62	Degree of education	Married	Rural	No	No	Unemployed	≤8 times	General or good	No	No	Yes	Yes
84.27	1.4	33.43	32	29	M	57	Degree of education	Married	Urban	Yes	No	Unemployed	＞8 times	General or good	No	No	No	Yes
79.44	1.4	29.92	33	26	M	57	Below high school	Married	Urban	No	No	Unemployed	≤8 times	General or good	No	No	No	Yes
73.56	1.08	36.34	34	34	M	52	Below high school	Married	Urban	Yes	No	Unemployed	≤8 times	General or good	No	No	No	Yes

## Sheet: Depression group
BDNF	NT-3	5-HT	SAS score	SDS score	Sex	Age	Degree of education	Marital status	Household registration	Smoking	Drinking	Working status	Monthly dialysis times	Economic status	Fatigue	Insomnia	Vascular pain	Restless legs syndrome
60.77	3.89	66.32	57	54	F	45	Degree of education	Married	Rural	Yes	No	Unemployed	≤8 times	Worsening	Yes	Yes	Yes	No
90.86	1.61	46.89	38	57	M	68	Degree of education	Married	Rural	No	Yes	Unemployed	≤8 times	Worsening	No	Yes	No	No
65.7	1.65	43.35	32	75	M	51	Below high school	Single	Rural	Yes	Yes	Unemployed	＞8 times	General or good	No	No	Yes	No
78.36	1.56	39.43	33	60	F	66	Degree of education	Single	Rural	No	Yes	Unemployed	≤8 times	Worsening	Yes	No	Yes	No
77.93	1.53	38.03	31	64	F	61	Degree of education	Married	Urban	Yes	No	Unemployed	≤8 times	General or good	No	No	Yes	No
87.37	1.56	37.37	29	57	M	50	Degree of education	Married	Rural	No	No	Unemployed	≤8 times	Worsening	No	No	Yes	No
73.9	1.45	42.76	28	68	F	65	Degree of education	Married	Urban	No	No	Unemployed	＞8 times	General or good	Yes	Yes	Yes	No
82.71	1.65	38.91	33	69	F	64	Degree of education	Single	Urban	Yes	No	In-service	＞8 times	Worsening	Yes	Yes	Yes	No
78.95	1.6	43.14	26	66	M	64	Degree of education	Married	Rural	Yes	No	Unemployed	＞8 times	Worsening	Yes	No	No	No
73.77	1.96	37.19	31	51	M	54	Below high school	Married	Urban	Yes	No	Unemployed	＞8 times	Worsening	Yes	Yes	Yes	No
74.34	1.66	44.07	30	53	F	57	Below high school	Married	Urban	No	No	Unemployed	＞8 times	General or good	Yes	No	Yes	No
47.16	1.67	37.72	34	56	F	55	Degree of education	Married	Urban	No	No	Unemployed	＞8 times	Worsening	Yes	No	Yes	No
88.83	1.49	37.85	41	81	M	49	Degree of education	Married	Urban	No	No	Unemployed	＞8 times	Worsening	Yes	Yes	Yes	No
88.14	1.59	46.01	39	60	F	56	Below high school	Married	Rural	No	No	Unemployed	＞8 times	Worsening	Yes	No	Yes	No
76.91	1.69	38.92	31	71	M	41	Degree of education	Married	Urban	No	No	Unemployed	≤8 times	Worsening	No	No	No	No
76.25	1.47	42.66	40	67	F	68	Below high school	Single	Urban	No	No	In-service	＞8 times	Worsening	Yes	Yes	Yes	No
73.58	1.56	41.35	31	60	M	58	Degree of education	Married	Urban	Yes	No	Unemployed	＞8 times	Worsening	No	Yes	No	No
74.55	1.74	39.5	27	55	M	51	Degree of education	Single	Urban	No	No	Unemployed	≤8 times	General or good	No	Yes	No	No
89.33	1.54	42.73	29	52	F	69	Below high school	Married	Urban	No	No	Unemployed	＞8 times	Worsening	No	Yes	No	No
87.31	1.73	43.6	39	62	M	57	Below high school	Married	Urban	Yes	No	Unemployed	＞8 times	General or good	Yes	No	No	No
72.51	1.48	39.94	29	65	M	50	Degree of education	Married	Urban	No	No	In-service	＞8 times	General or good	Yes	Yes	No	No
91.61	1.92	37.63	32	61	M	44	Below high school	Married	Urban	No	No	Unemployed	＞8 times	Worsening	Yes	Yes	No	No
79.7	1.5	38.16	21	64	M	61	Degree of education	Married	Urban	Yes	No	Unemployed	≤8 times	Worsening	Yes	No	No	No
69.59	1.48	47.11	31	67	M	51	Below high school	Married	Urban	Yes	No	Unemployed	＞8 times	General or good	Yes	Yes	Yes	No
77.87	1.79	37.36	23	56	F	43	Degree of education	Married	Rural	Yes	No	Unemployed	＞8 times	Worsening	Yes	Yes	Yes	No
66.26	1.85	42.41	32	60	M	50	Below high school	Single	Urban	Yes	No	Unemployed	≤8 times	Worsening	Yes	Yes	No	No
86.65	1.67	39.66	31	56	M	52	Degree of education	Married	Urban	Yes	No	Unemployed	＞8 times	Worsening	No	No	Yes	No
81.35	1.78	43.38	27	75	F	51	Below high school	Single	Urban	No	No	In-service	＞8 times	Worsening	No	No	Yes	No
80.66	1.68	43.58	30	68	M	67	Degree of education	Married	Rural	No	No	Unemployed	＞8 times	General or good	Yes	Yes	Yes	No
79.66	1.64	47.36	37	54	M	58	Degree of education	Married	Urban	Yes	No	Unemployed	＞8 times	General or good	Yes	No	Yes	No
79.89	1.65	42.47	20	52	M	68	Below high school	Married	Urban	Yes	No	Unemployed	＞8 times	Worsening	Yes	No	Yes	No
83.82	1.61	44.54	31	61	M	60	Below high school	Married	Rural	Yes	No	Unemployed	＞8 times	Worsening	No	No	Yes	No
67.71	1.65	37.25	28	58	M	52	Degree of education	Single	Urban	Yes	No	Unemployed	≤8 times	Worsening	No	Yes	Yes	No
83.91	1.86	37.76	40	53	M	45	Degree of education	Single	Urban	Yes	No	Unemployed	≤8 times	Worsening	Yes	No	Yes	No
51.63	1.49	39.59	37	53	M	54	Degree of education	Single	Rural	No	No	Unemployed	＞8 times	General or good	Yes	No	No	No
61.01	1.49	39.74	35	69	M	47	Below high school	Married	Urban	No	No	Unemployed	＞8 times	General or good	Yes	Yes	Yes	No
91.14	5.36	78.36	60	52	M	45	Degree of education	Single	Rural	Yes	No	Unemployed	＞8 times	Worsening	Yes	Yes	Yes	Yes
77.82	3.23	65.16	60	61	M	63	Degree of education	Married	Rural	Yes	No	Unemployed	＞8 times	Worsening	Yes	Yes	No	Yes
74.55	4.53	78.04	52	71	M	56	Below high school	Married	Rural	Yes	No	Unemployed	＞8 times	General or good	No	Yes	No	Yes
70.37	3.85	79.22	66	71	M	56	Degree of education	Married	Urban	No	No	In-service	＞8 times	General or good	Yes	Yes	Yes	Yes
67.89	3.43	68.27	56	81	F	68	Below high school	Married	Rural	No	No	Unemployed	＞8 times	Worsening	No	Yes	Yes	Yes
71.91	4.58	63.36	68	56	F	55	Below high school	Married	Urban	No	No	Unemployed	＞8 times	General or good	No	Yes	Yes	Yes
77.65	3.52	68.22	51	61	F	66	Degree of education	Single	Rural	Yes	No	Unemployed	＞8 times	Worsening	Yes	Yes	No	Yes
88.1	3.55	68.14	54	59	M	61	Below high school	Married	Rural	Yes	No	Unemployed	＞8 times	Worsening	No	Yes	No	Yes
74.61	3.41	67.05	58	61	F	56	Degree of education	Married	Urban	No	No	Unemployed	＞8 times	General or good	Yes	Yes	Yes	Yes
85.04	3.66	66.19	64	78	F	56	Below high school	Married	Urban	Yes	No	Unemployed	＞8 times	Worsening	No	Yes	Yes	Yes
81.21	4.64	76.04	52	54	M	56	Degree of education	Married	Rural	Yes	No	Unemployed	＞8 times	Worsening	No	Yes	Yes	Yes
92.86	4.22	74.01	54	56	M	55	Below high school	Married	Urban	Yes	No	Unemployed	≤8 times	General or good	Yes	Yes	Yes	Yes
81.63	3.27	65.17	70	69	F	68	Degree of education	Married	Rural	Yes	No	Unemployed	＞8 times	Worsening	No	Yes	No	Yes
82.07	3.44	77.02	58	57	F	58	Below high school	Married	Rural	No	No	Unemployed	＞8 times	General or good	No	Yes	No	Yes
80.92	3.59	77.74	66	69	F	69	Below high school	Married	Rural	No	No	Unemployed	＞8 times	Worsening	Yes	Yes	Yes	Yes
71.35	3.42	70.1	56	69	F	63	Below high school	Married	Rural	No	No	In-service	＞8 times	General or good	No	Yes	No	Yes
68.53	3.47	64.73	54	57	F	47	Degree of education	Married	Urban	No	No	Unemployed	＞8 times	Worsening	Yes	Yes	Yes	Yes
64.6	5	67.31	75	53	F	48	Degree of education	Married	Urban	No	No	Unemployed	＞8 times	Worsening	Yes	Yes	No	Yes
76.23	3.33	66	57	64	M	47	Below high school	Married	Urban	No	No	Unemployed	＞8 times	General or good	Yes	Yes	Yes	Yes
67.8	3.94	73.18	55	53	M	51	Below high school	Married	Rural	No	No	In-service	＞8 times	Worsening	No	Yes	Yes	Yes
69.95	4.01	76.92	56	62	M	54	Degree of education	Married	Rural	No	No	Unemployed	＞8 times	Worsening	No	No	Yes	Yes
78.75	3.59	73.67	51	56	M	49	Degree of education	Single	Rural	No	No	Unemployed	＞8 times	Worsening	No	Yes	Yes	Yes
104.12	3.44	67.84	66	62	F	53	Degree of education	Married	Rural	Yes	No	Unemployed	＞8 times	General or good	Yes	No	No	Yes
66.37	4.34	62.81	66	68	M	55	Below high school	Married	Rural	No	No	Unemployed	＞8 times	Worsening	Yes	No	No	Yes
52.45	4.04	66.15	58	58	F	46	Below high school	Married	Urban	No	No	Unemployed	＞8 times	General or good	No	Yes	No	Yes
55.35	3.4	62.8	76	56	F	61	Degree of education	Married	Rural	No	No	Unemployed	＞8 times	Worsening	No	No	Yes	Yes
72.45	1.48	41.86	37	62	M	64	Below high school	Single	Urban	Yes	Yes	Unemployed	＞8 times	Worsening	No	No	Yes	Yes
77.52	2.12	44.66	33	75	F	62	Below high school	Married	Urban	Yes	No	Unemployed	＞8 times	General or good	No	No	Yes	Yes
83.87	1.65	40.07	26	53	F	61	Degree of education	Married	Urban	No	No	Unemployed	＞8 times	Worsening	Yes	No	No	Yes
75.91	1.62	42.31	32	58	M	66	Degree of education	Married	Urban	Yes	No	Unemployed	≤8 times	Worsening	Yes	No	No	Yes
78.15	1.52	40.57	27	52	M	65	Degree of education	Married	Rural	No	No	Unemployed	＞8 times	General or good	Yes	Yes	No	Yes
90.03	1.93	42.11	33	69	M	59	Degree of education	Single	Urban	No	No	Unemployed	≤8 times	Worsening	No	Yes	Yes	Yes
78.9	1.43	41.11	35	73	M	59	Below high school	Married	Urban	Yes	No	Unemployed	≤8 times	Worsening	Yes	Yes	Yes	Yes
78.77	1.45	39.92	41	54	M	56	Below high school	Married	Urban	Yes	No	Unemployed	＞8 times	General or good	No	No	Yes	Yes
66.66	1.67	42.56	24	66	M	52	Below high school	Single	Urban	No	No	Unemployed	＞8 times	Worsening	No	Yes	No	Yes
85.75	1.61	46.03	41	56	M	69	Below high school	Married	Urban	Yes	No	Unemployed	≤8 times	Worsening	No	Yes	Yes	Yes
83.65	1.96	38.66	34	81	M	59	Below high school	Married	Urban	Yes	No	Unemployed	≤8 times	Worsening	No	Yes	Yes	Yes
87.92	1.74	44.3	42	67	M	54	Below high school	Married	Urban	Yes	No	In-service	≤8 times	Worsening	Yes	No	Yes	Yes
77.49	1.52	37.79	33	59	F	66	Degree of education	Married	Urban	Yes	No	Unemployed	≤8 times	Worsening	No	Yes	Yes	Yes
64.71	1.67	44.94	25	73	M	61	Degree of education	Married	Urban	Yes	No	Unemployed	＞8 times	General or good	No	No	Yes	Yes
67.67	1.48	43.26	31	54	M	62	Degree of education	Married	Urban	No	No	Unemployed	≤8 times	General or good	Yes	No	Yes	Yes

## Sheet: Non-depressed group
BDNF	NT-3	5-HT	SAS score	SDS socre	Sex	Age	Degree of education	Marital status	Household registration	Smoking	Drinking	Working status	Monthly dialysis times	Economic status	Fatigue	Insomnia	Vascular pain	Restless legs syndrome
59.76	1.38	36.13	33	29	M	51	Degree of education	Married	Urban	Yes	Yes	In-service	≤8 times	General or good	Yes	No	Yes	No
98.96	1.24	37.18	28	31	F	59	Below high school	Married	Urban	Yes	Yes	Unemployed	＞8 times	General or good	No	No	Yes	No
66.61	1.01	30.57	30	25	F	69	Below high school	Married	Urban	No	No	Unemployed	≤8 times	General or good	No	No	No	No
98.68	1.27	36.21	32	30	F	48	Degree of education	Married	Urban	Yes	No	Unemployed	＞8 times	General or good	No	No	Yes	No
85.13	1.24	33.51	45	40	M	45	Below high school	Married	Urban	No	No	Unemployed	≤8 times	General or good	No	Yes	Yes	No
76.42	1.31	36.65	18	29	M	62	Degree of education	Married	Urban	Yes	No	Unemployed	≤8 times	General or good	Yes	No	No	No
78.12	1.4	34.97	34	28	F	62	Degree of education	Single	Urban	Yes	No	Unemployed	＞8 times	General or good	Yes	Yes	No	No
86.98	1.39	35.58	36	19	F	62	Degree of education	Married	Rural	Yes	No	Unemployed	＞8 times	General or good	No	No	No	No
96.56	1.17	35.41	25	21	M	62	Degree of education	Married	Urban	No	No	Unemployed	≤8 times	General or good	No	Yes	No	No
82.65	1.31	32.28	35	16	F	53	Degree of education	Married	Rural	No	No	Unemployed	＞8 times	General or good	No	No	Yes	No
92.38	1.29	35.61	28	26	M	55	Degree of education	Married	Urban	Yes	No	Unemployed	≤8 times	Worsening	No	No	No	No
86.81	1.39	29.78	28	37	M	48	Degree of education	Married	Rural	No	No	In-service	≤8 times	General or good	No	No	No	No
77.02	1.28	37.05	32	31	M	53	Below high school	Married	Urban	Yes	No	Unemployed	＞8 times	General or good	Yes	No	Yes	No
75.83	1.17	36.96	38	27	M	56	Degree of education	Married	Urban	Yes	No	In-service	≤8 times	General or good	No	No	No	No
76.18	1.33	34.5	37	36	M	51	Degree of education	Married	Urban	Yes	No	Unemployed	＞8 times	General or good	No	Yes	Yes	No
74.09	1.41	36.73	27	31	M	65	Degree of education	Married	Urban	No	No	Unemployed	＞8 times	General or good	Yes	No	No	No
85.53	1.38	32.1	37	20	M	52	Below high school	Married	Urban	No	No	Unemployed	≤8 times	General or good	No	No	Yes	No
68.82	1.31	35.09	29	34	M	46	Below high school	Married	Urban	Yes	No	Unemployed	≤8 times	Worsening	No	Yes	No	No
69.83	1.42	31.2	34	32	F	61	Below high school	Married	Urban	Yes	No	Unemployed	＞8 times	Worsening	Yes	No	No	No
95.25	2.97	62.51	53	45	F	63	Degree of education	Married	Urban	Yes	No	Unemployed	＞8 times	General or good	No	No	No	Yes
102.82	2.88	47.31	64	31	F	64	Below high school	Married	Urban	No	No	Unemployed	＞8 times	General or good	Yes	No	Yes	Yes
95.11	2.77	61.51	50	32	M	54	Below high school	Married	Urban	Yes	No	Unemployed	＞8 times	General or good	No	No	Yes	Yes
97.31	2.27	61.66	76	28	M	43	Degree of education	Married	Urban	Yes	No	In-service	＞8 times	Worsening	No	No	Yes	Yes
79.39	2.81	61.98	51	32	F	51	Below high school	Married	Urban	Yes	No	Unemployed	＞8 times	General or good	Yes	No	Yes	Yes
70.83	3.01	52.89	64	27	F	59	Degree of education	Married	Urban	No	No	Unemployed	＞8 times	General or good	Yes	No	No	Yes
77.78	3.01	62.03	50	34	F	45	Degree of education	Married	Urban	Yes	No	Unemployed	＞8 times	General or good	Yes	Yes	No	Yes
85.56	2.94	60.33	53	22	F	53	Degree of education	Married	Urban	No	No	Unemployed	＞8 times	Worsening	No	Yes	No	Yes
101.2	2.88	57.72	57	37	M	61	Below high school	Married	Urban	No	No	In-service	＞8 times	Worsening	No	No	No	Yes
73.26	3.14	57.53	53	24	F	53	Below high school	Married	Urban	No	No	Unemployed	＞8 times	General or good	No	Yes	No	Yes
87.14	2.68	58.44	58	33	M	54	Below high school	Married	Urban	Yes	No	Unemployed	≤8 times	Worsening	No	No	Yes	Yes
101.42	2.51	61.11	57	33	M	52	Below high school	Married	Urban	Yes	Yes	Unemployed	＞8 times	General or good	No	No	Yes	Yes
67.99	2.78	59.49	58	17	M	58	Degree of education	Married	Urban	No	No	Unemployed	＞8 times	Worsening	No	No	Yes	Yes
70.79	2.96	60.33	69	33	F	52	Degree of education	Married	Urban	No	No	Unemployed	≤8 times	Worsening	Yes	No	No	Yes
98.54	0.92	35.4	20	35	F	59	Below high school	Married	Urban	No	No	Unemployed	＞8 times	Worsening	Yes	No	No	Yes
98.72	0.86	36.51	22	23	F	59	Degree of education	Married	Urban	No	No	Unemployed	≤8 times	General or good	No	No	Yes	Yes
93.72	1.29	35.87	34	29	M	51	Below high school	Married	Urban	Yes	No	Unemployed	＞8 times	Worsening	Yes	No	No	Yes
74.09	1.38	36.26	38	30	M	56	Below high school	Married	Urban	No	No	Unemployed	＞8 times	General or good	No	No	No	Yes
99.19	1.37	31.78	24	37	M	62	Below high school	Married	Urban	Yes	No	In-service	＞8 times	Worsening	No	No	Yes	Yes
80.06	1.36	35.2	37	30	M	53	Below high school	Married	Urban	Yes	No	Unemployed	＞8 times	General or good	No	Yes	Yes	Yes
77.86	1.29	35.63	40	22	M	62	Degree of education	Married	Rural	No	No	Unemployed	≤8 times	General or good	No	No	Yes	Yes
84.27	1.4	33.43	32	29	M	57	Degree of education	Married	Urban	Yes	No	Unemployed	＞8 times	General or good	No	No	No	Yes
79.44	1.4	29.92	33	26	M	57	Below high school	Married	Urban	No	No	Unemployed	≤8 times	General or good	No	No	No	Yes
73.56	1.08	36.34	34	34	M	52	Below high school	Married	Urban	Yes	No	Unemployed	≤8 times	General or good	No	No	No	Yes

## Sheet: Anxiety Logistic analysis
Anxiety state	Sex（M=0/F=1）	Household registration（Urban=0/Rural=1）	Insomnia（No=0/Yes=1）	Monthly dialysis times（≤8 times=0/＞8 times=1）	Restless legs syndrome（No=0/Yes=1）
1	1	1	1	0	0
1	1	0	0	1	1
1	0	1	1	1	1
1	0	1	1	1	1
1	0	1	1	1	1
1	0	0	1	1	1
1	1	1	1	1	1
1	1	0	1	1	1
1	1	1	1	1	1
1	0	1	1	1	1
1	1	0	1	1	1
1	1	0	1	1	1
1	0	1	1	1	1
1	1	0	0	1	1
1	0	0	1	0	1
1	1	1	1	1	1
1	1	1	1	1	1
1	1	1	1	1	1
1	1	1	1	1	1
1	1	0	1	1	1
1	1	0	1	1	1
1	0	0	1	1	1
1	0	1	1	1	1
1	0	1	0	1	1
1	0	0	0	1	1
1	0	1	1	1	1
1	1	1	0	1	1
1	0	0	0	1	1
1	1	0	0	1	1
1	1	0	0	1	1
1	1	0	1	1	1
1	0	1	0	1	1
1	1	0	1	1	1
1	0	0	0	1	1
1	1	0	1	1	1
1	0	0	0	0	1
1	0	0	0	1	1
1	1	0	1	1	1
1	0	0	0	1	1
1	1	1	0	1	1
1	1	0	0	0	1
0	0	1	1	0	0
0	0	1	0	1	0
0	0	0	0	0	0
0	1	1	0	0	0
0	1	0	0	1	0
0	1	0	0	0	0
0	1	0	0	0	0
0	0	1	0	0	0
0	1	0	1	1	0
0	1	0	1	1	0
0	0	1	0	1	0
0	0	0	1	1	0
0	1	0	0	1	0
0	1	0	0	1	0
0	0	0	1	1	0
0	1	1	0	1	0
0	0	0	0	0	0
0	1	0	0	1	0
0	1	0	1	1	0
0	0	0	1	1	0
0	0	0	1	0	0
0	1	0	1	1	0
0	0	0	0	1	0
0	0	0	1	1	0
0	0	0	1	1	0
0	0	0	0	0	0
0	0	0	1	1	0
0	1	1	1	1	0
0	0	0	1	0	0
0	0	0	0	1	0
0	1	0	0	1	0
0	0	1	1	1	0
0	0	0	0	1	0
0	0	0	0	1	0
0	0	1	0	1	0
0	0	0	1	0	0
0	0	0	0	0	0
0	1	0	1	1	0
0	1	1	0	1	0
0	0	0	1	0	0
0	1	1	0	1	0
0	0	0	0	0	0
0	0	1	0	0	0
0	0	0	0	1	0
0	0	0	1	0	0
0	0	0	0	0	0
0	0	1	0	1	0
0	0	0	1	1	0
0	0	0	0	0	0
0	0	0	1	1	0
0	0	0	0	1	0
0	0	0	0	0	0
0	0	0	1	0	0
0	1	0	0	1	0
0	0	0	0	1	1
0	1	0	0	1	1
0	1	0	0	1	1
0	0	0	0	0	1
0	0	1	1	1	1
0	0	0	1	0	1
0	0	0	1	0	1
0	0	0	0	1	1
0	0	0	1	1	1
0	0	0	1	0	1
0	0	0	1	0	1
0	0	0	0	0	1
0	1	0	1	0	1
0	1	0	0	1	1
0	1	0	0	0	1
0	0	0	0	1	1
0	0	0	0	0	1
0	0	0	0	1	1
0	0	0	0	1	1
0	0	0	0	1	1
0	0	0	1	1	1
0	0	1	0	0	1
0	0	0	0	1	1
0	0	0	0	0	1
0	0	0	0	0	1

## Sheet: Multivariate Logistic analysis
Anxiety state	Marital status（Married=0/Single=1）	Household registration（Urban=0/Rural=1）	Economic status（General or good=0/Worsening=1）	Fatigue（No=0/Yes=1）	Insomnia（No=0/Yes=1）	Vascular pain（No=0/Yes=1）
1	0	1	1	1	1	1
1	0	1	1	0	1	0
1	1	1	0	0	0	1
1	1	1	1	1	0	1
1	0	0	0	0	0	1
1	0	1	1	0	0	1
1	0	0	0	1	1	1
1	1	0	1	1	1	1
1	0	1	1	1	0	0
1	0	0	1	1	1	1
1	0	0	0	1	0	1
1	0	0	1	1	0	1
1	0	0	1	1	1	1
1	0	1	1	1	0	1
1	0	0	1	0	0	0
1	1	0	1	1	1	1
1	0	0	1	0	1	0
1	1	0	0	0	1	0
1	0	0	1	0	1	0
1	0	0	0	1	0	0
1	0	0	0	1	1	0
1	0	0	1	1	1	0
1	0	0	1	1	0	0
1	0	0	0	1	1	1
1	0	1	1	1	1	1
1	1	0	1	1	1	0
1	0	0	1	0	0	1
1	1	0	1	0	0	1
1	0	1	0	1	1	1
1	0	0	0	1	0	1
1	0	0	1	1	0	1
1	0	1	1	0	0	1
1	1	0	1	0	1	1
1	1	0	1	1	0	1
1	1	1	0	1	0	0
1	0	0	0	1	1	1
1	1	1	1	1	1	1
1	0	1	1	1	1	0
1	0	1	0	0	1	0
1	0	0	0	1	1	1
1	0	1	1	0	1	1
1	0	0	0	0	1	1
1	1	1	1	1	1	0
1	0	1	1	0	1	0
1	0	0	0	1	1	1
1	0	0	1	0	1	1
1	0	1	1	0	1	1
1	0	0	0	1	1	1
1	0	1	1	0	1	0
1	0	1	0	0	1	0
1	0	1	1	1	1	1
1	0	1	0	0	1	0
1	0	0	1	1	1	1
1	0	0	1	1	1	0
1	0	0	0	1	1	1
1	0	1	1	0	1	1
1	0	1	1	0	0	1
1	1	1	1	0	1	1
1	0	1	0	1	0	0
1	0	1	1	1	0	0
1	0	0	0	0	1	0
1	0	1	1	0	0	1
1	1	0	1	0	0	1
1	0	0	0	0	0	1
1	0	0	1	1	0	0
1	0	0	1	1	0	0
1	0	1	0	1	1	0
1	1	0	1	0	1	1
1	0	0	1	1	1	1
1	0	0	0	0	0	1
1	1	0	1	0	1	0
1	0	0	1	0	1	1
1	0	0	1	0	1	1
1	0	0	1	1	0	1
1	0	0	1	0	1	1
1	0	0	0	0	0	1
1	0	0	0	1	0	1
0	0	0	0	1	0	1
0	0	0	0	0	0	1
0	0	0	0	0	0	0
0	0	0	0	0	0	1
0	0	0	0	0	1	1
0	0	0	0	1	0	0
0	1	0	0	1	1	0
0	0	1	0	0	0	0
0	0	0	0	0	1	0
0	0	1	0	0	0	1
0	0	0	1	0	0	0
0	0	1	0	0	0	0
0	0	0	0	1	0	1
0	0	0	0	0	0	0
0	0	0	0	0	1	1
0	0	0	0	1	0	0
0	0	0	0	0	0	1
0	0	0	1	0	1	0
0	0	0	1	1	0	0
0	0	0	0	0	0	0
0	0	0	0	1	0	1
0	0	0	0	0	0	1
0	0	0	1	0	0	1
0	0	0	0	1	0	1
0	0	0	0	1	0	0
0	0	0	0	1	1	0
0	0	0	1	0	1	0
0	0	0	1	0	0	0
0	0	0	0	0	1	0
0	0	0	1	0	0	1
0	0	0	0	0	0	1
0	0	0	1	0	0	1
0	0	0	1	1	0	0
0	0	0	1	1	0	0
0	0	0	0	0	0	1
0	0	0	1	1	0	0
0	0	0	0	0	0	0
0	0	0	1	0	0	1
0	0	0	0	0	1	1
0	0	1	0	0	0	1
0	0	0	0	0	0	0
0	0	0	0	0	0	0
0	0	0	0	0	0	0
